# Supplementary material for: Thiosemicarbazonecopper/Halido Systems: Structure and DFT Analysis of the Magnetic Coupling
Source: MDPI journal article supplement (doi:10.3390/inorganics11010031), 2023-01-03
Supplement: s1 [file s1]

# Supplementary Material

## **Thiosemicarbazonecopper/Halido Systems: Structure and DFT Analysis of the Magnetic Coupling**

Alondra Jiménez-Pérez <sup>1</sup>, Sara Marcos-Gómez <sup>1</sup>, Gotzon Madariaga <sup>2</sup>, Manuel Zapico <sup>1</sup>, Pablo Vitoria <sup>3</sup>,  
Javier Tercero <sup>4</sup>, Begoña Torres <sup>5</sup>, Luis Lezama <sup>3</sup>, José Vicente Cuevas <sup>1</sup>, Iñigo Etxebarria <sup>2</sup> and Javier  
García-Tojal <sup>1,\*</sup>

<sup>1</sup> Department of Chemistry, University of Burgos, Pza. Misael Bañuelos s/n, E-9001 Burgos (Spain)

<sup>2</sup> Department of Physics, University of the Basque Country, P.O. Box 644, E-48080 Bilbao (Spain),  
and EHU Quantum Center, University of the Basque Country, UPV/EHU, Spain

<sup>3</sup> Department of Organic and Inorganic Chemistry, University of the Basque Country, P.O. Box  
644, E-48080 Bilbao (Spain)

<sup>4</sup> Department of Inorganic and Organic Chemistry, University of Barcelona, Faculty of Chemistry  
Martí i Franquès, 1-11 08028 Barcelona (Spain)

<sup>5</sup> Departamento de Matemáticas y Computación, Escuela Politécnica Superior, Universidad de  
Burgos, ES-09006 Burgos, Spain

## Index

|    |                                                               |    |
|----|---------------------------------------------------------------|----|
| 1. | Cu/HL/Cl <sup>-</sup> and Cu/HL/I <sup>-</sup> compounds..... | 3  |
| 1. | Figures.....                                                  | 3  |
| 2. | Tables .....                                                  | 11 |
| 2. | Computational studies.....                                    | 13 |
| 1. | Thermodynamics .....                                          | 13 |
| 2. | Molecular magnetism.....                                      | 16 |

## 1. Cu/HL/Cl<sup>-</sup> and Cu/HL/I<sup>-</sup> compounds

### 1. Figures

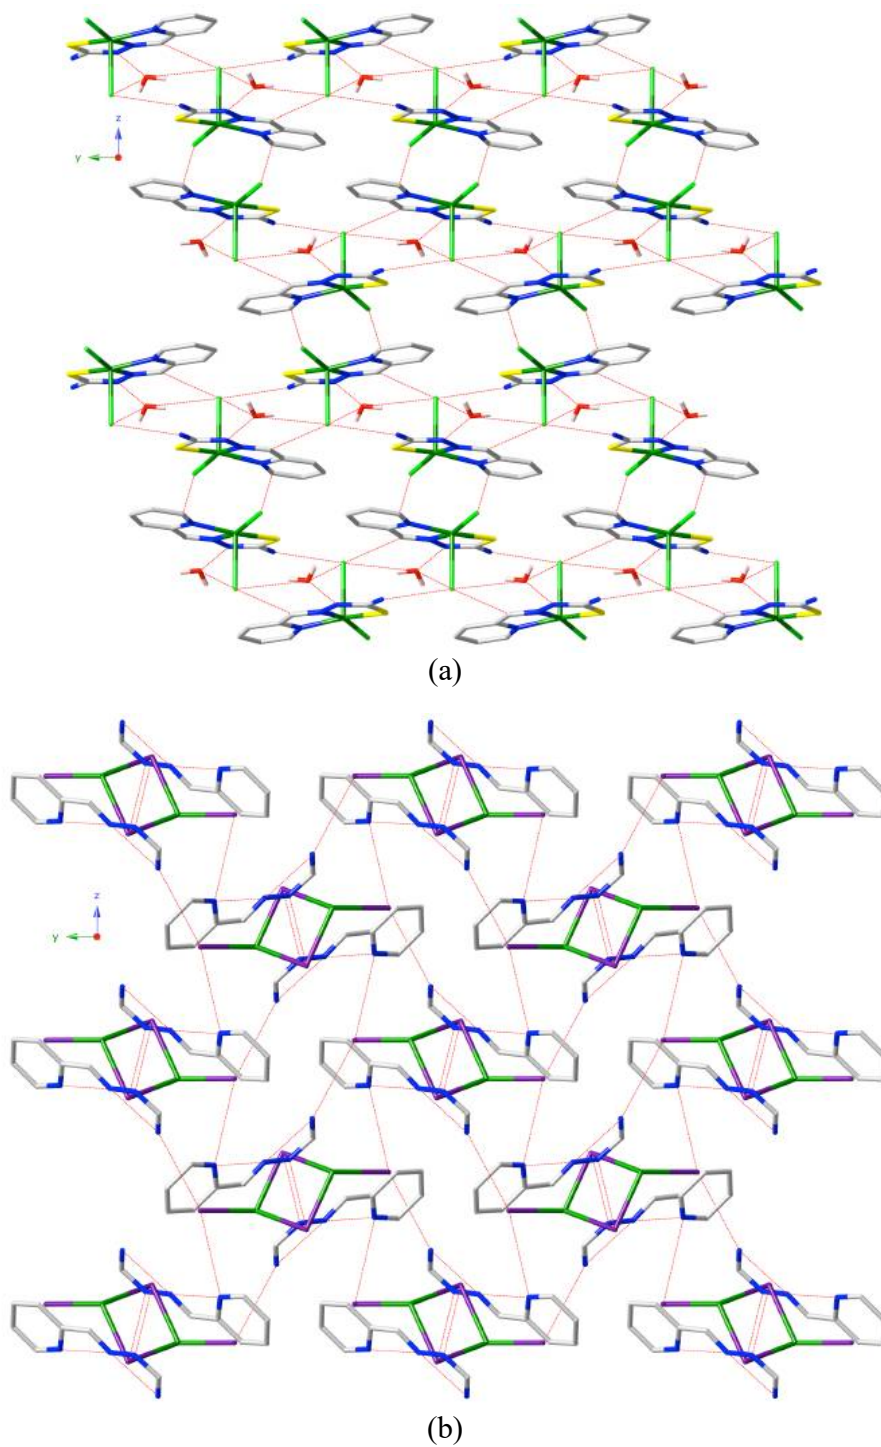

**Figure S1.1.** H-bonds (dotted red lines) for compounds **3** (a) and **4** (b). Hydrogen atoms (except in water molecules) have been omitted for clarity.

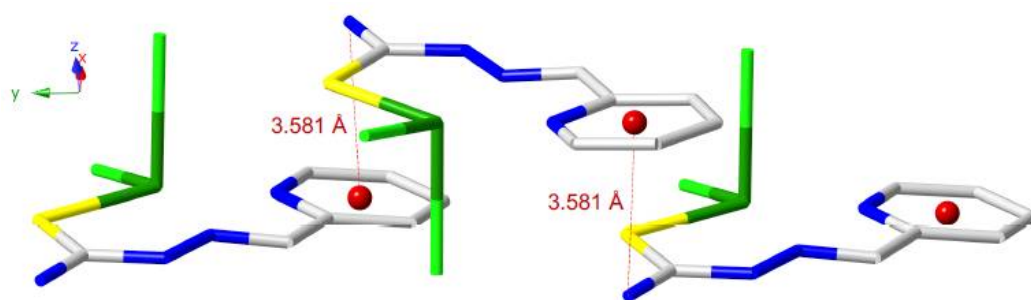

(a)

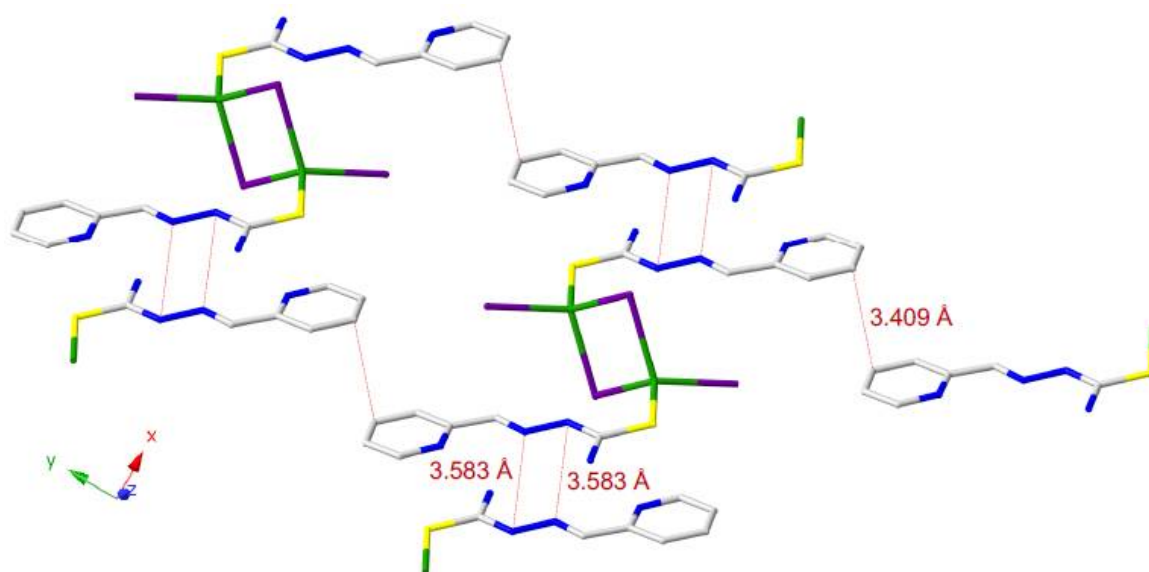

(b)

**Figure S1.2.**  $\pi$ - $\pi$  Stacking interactions for compounds **3** (a) and **4** (b).

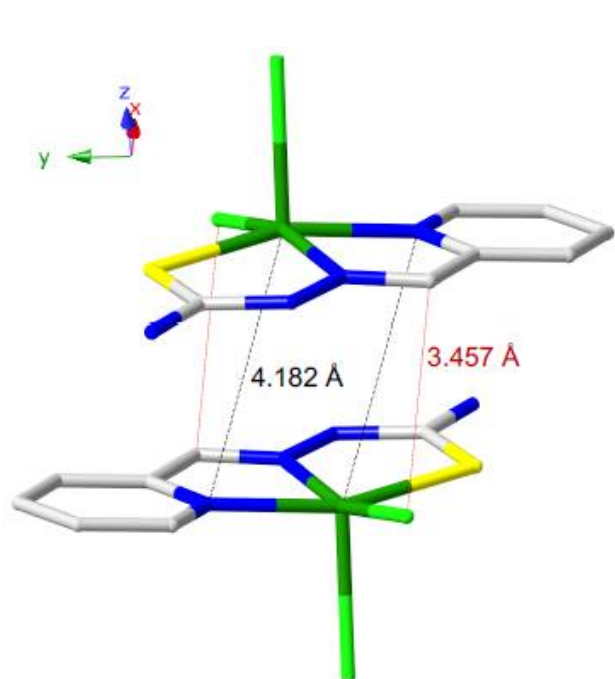

(a)

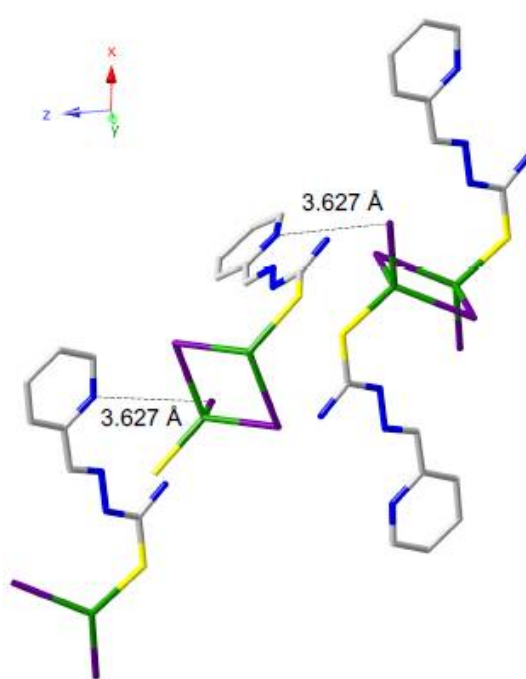

(b)

**Figure S1.3.** Anion– $\pi$  interactions for compounds **3** (a) and **4** (b).

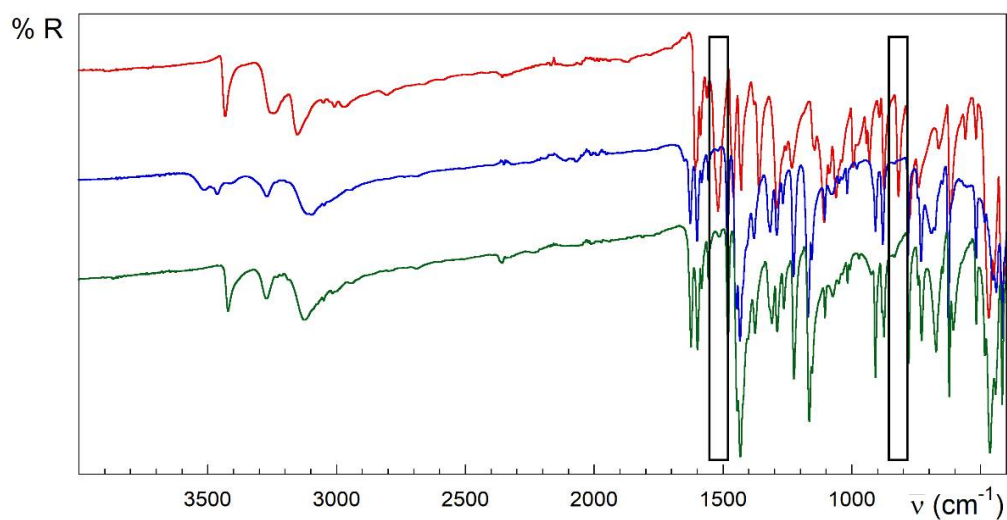

**Figure S1.4.** FTIR-ATR spectra of HL (red), **1** (blue) and **2** (green). Rectangles in black highlight the main differences between the spectra of the free ligand and  $[\{\text{CuLX}\}_2]$  complexes.

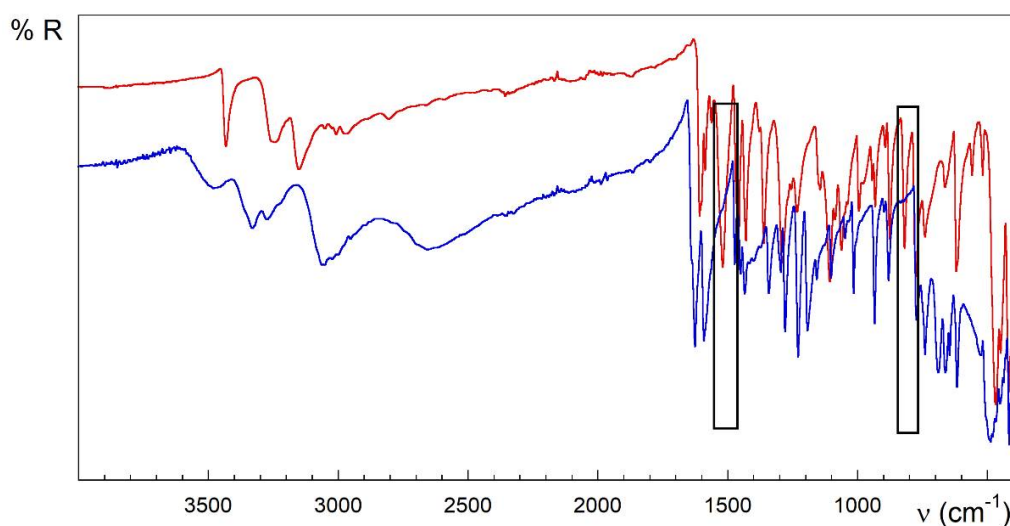

**Figure S1.5.** FTIR ATR spectra of compounds **1** vs **3**, rectangles frame the A and B regions (see main text).

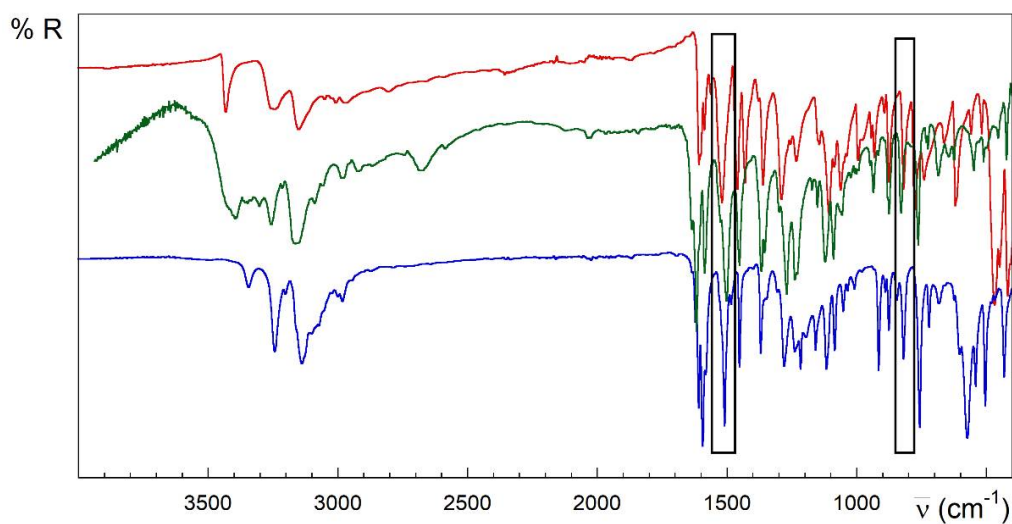

**Figure S1.6.** FTIR-ATR spectra of HL (red),  $(\text{H}_2\text{L})\text{Cl}\cdot\text{H}_2\text{O}$  (green) and **4** (blue). Rectangles in black show bands in the same spectral regions for the three compounds.

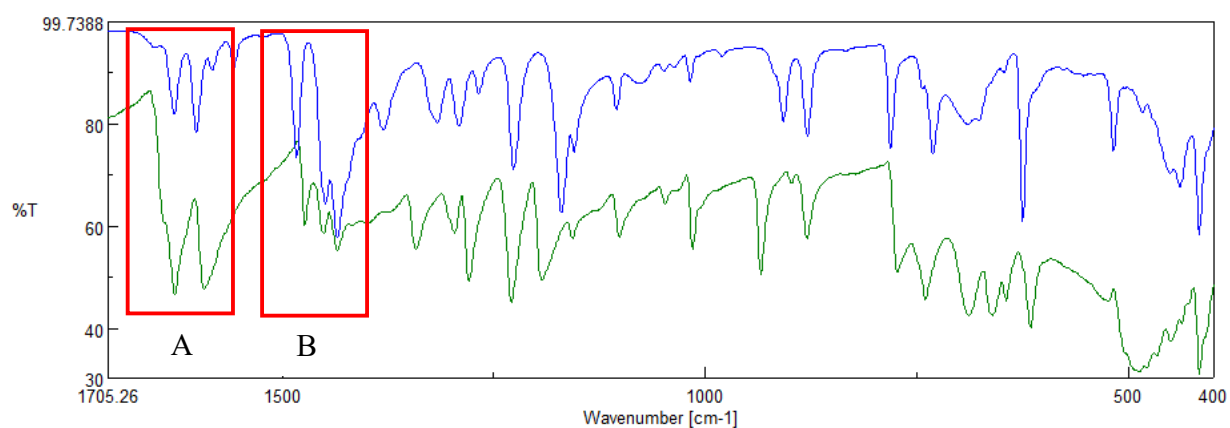

**Figure S1.7.** FTIR ATR spectra of compounds **1** vs **3**, rectangles frame the A and B regions (see main text).

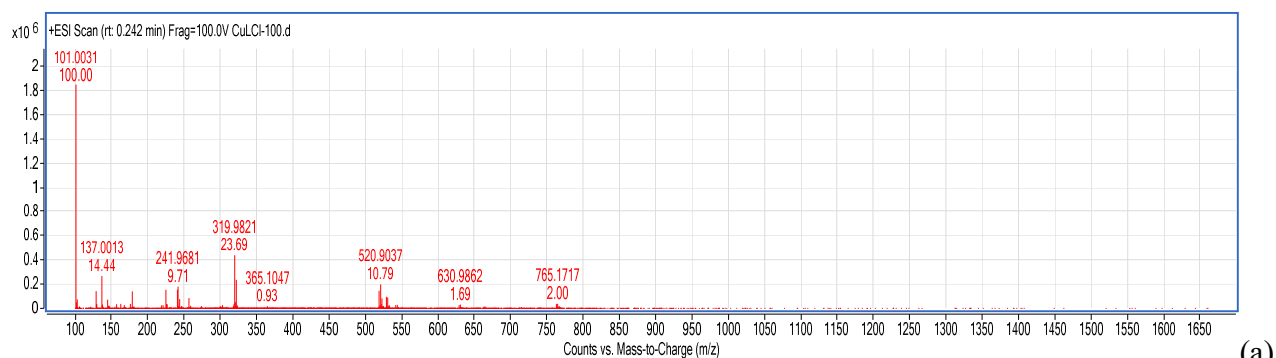

(a)

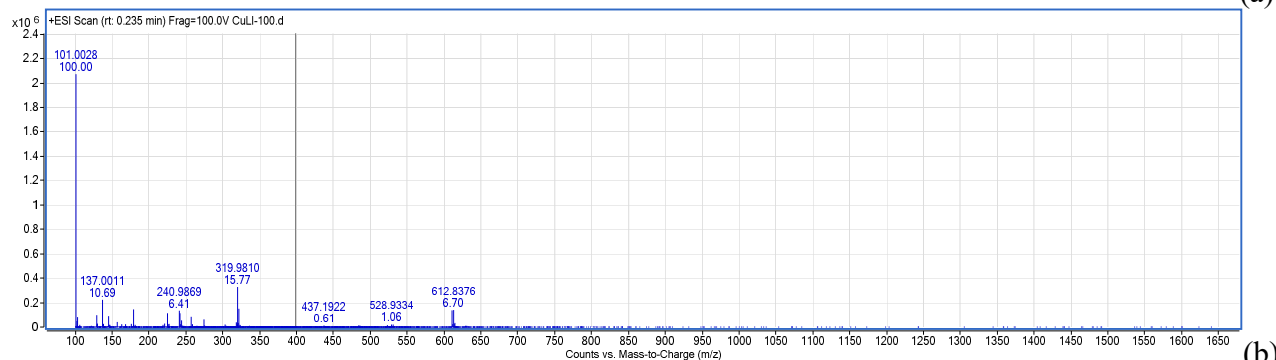

(b)

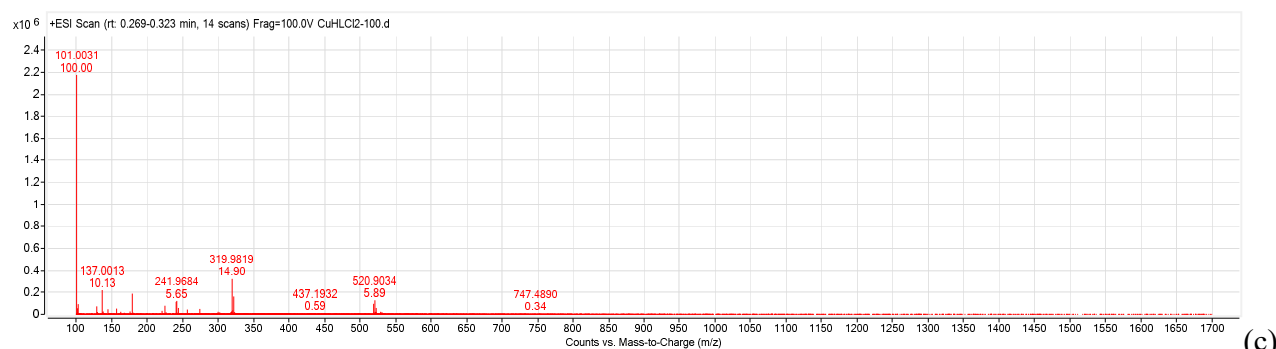

(c)

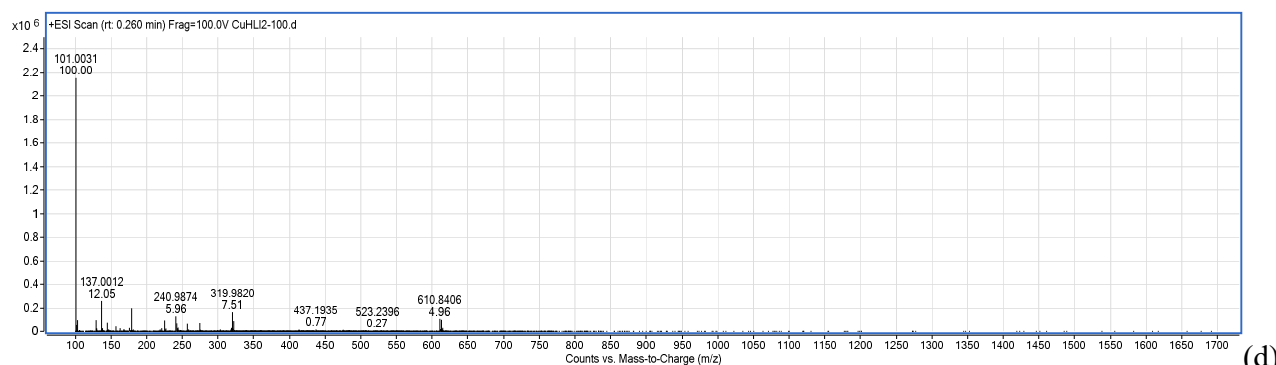

(d)

**Figure S1.8.** ESI<sup>+</sup> mass spectra of compounds **1** (a), **2** (b), **3** (c) and **4** (d), in DMSO solution.



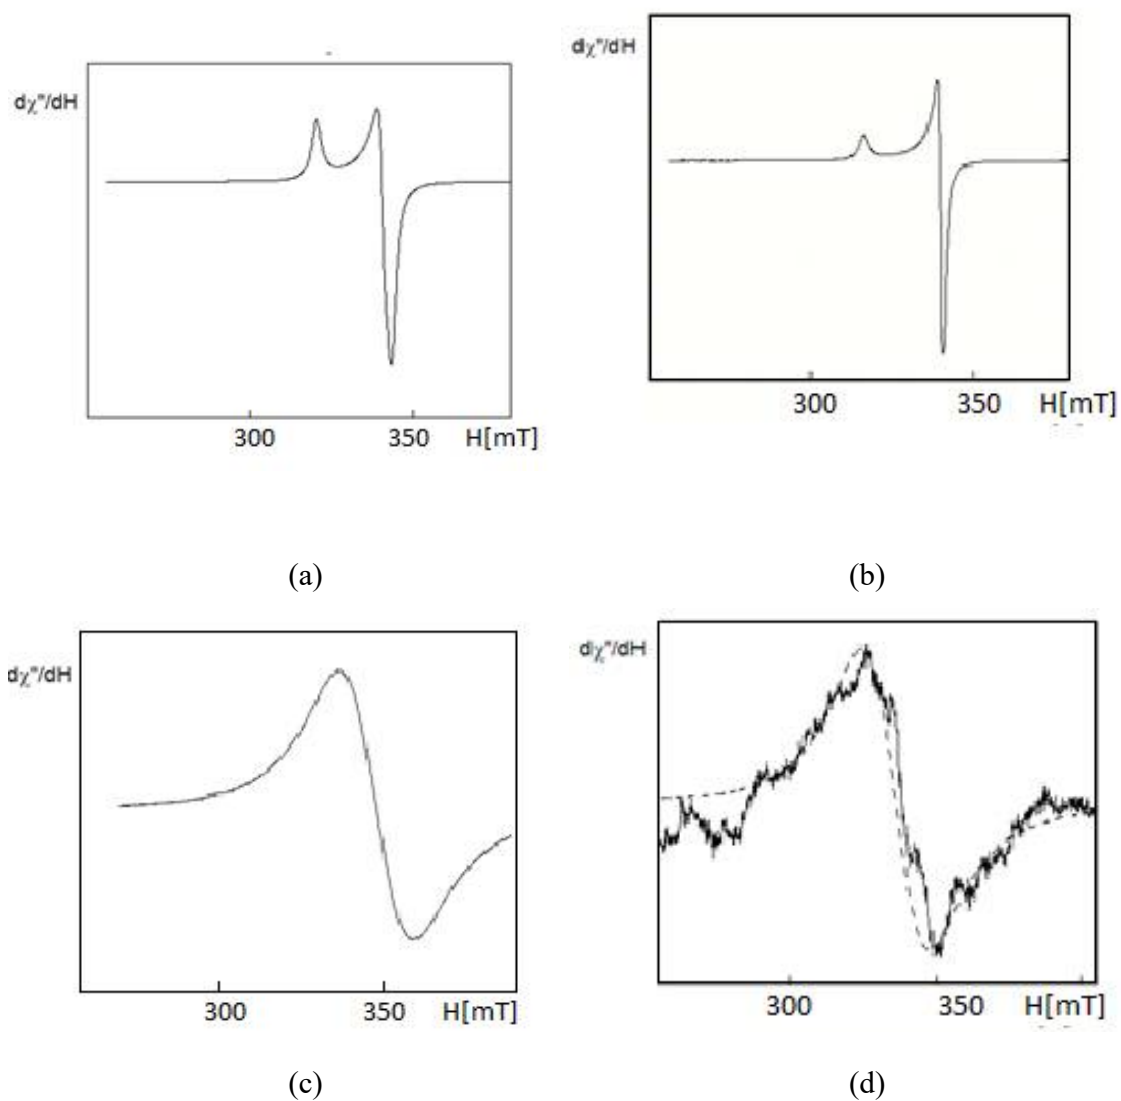

**Figure S1.9.** X-band EPR spectra at RT of compounds **1** (a), **3** (b) and **2** (c). Impurities in **4** (d), whose spectrum has been 120 fold magnified; in dotted lines, the spectrum of **2** for comparative purposes.

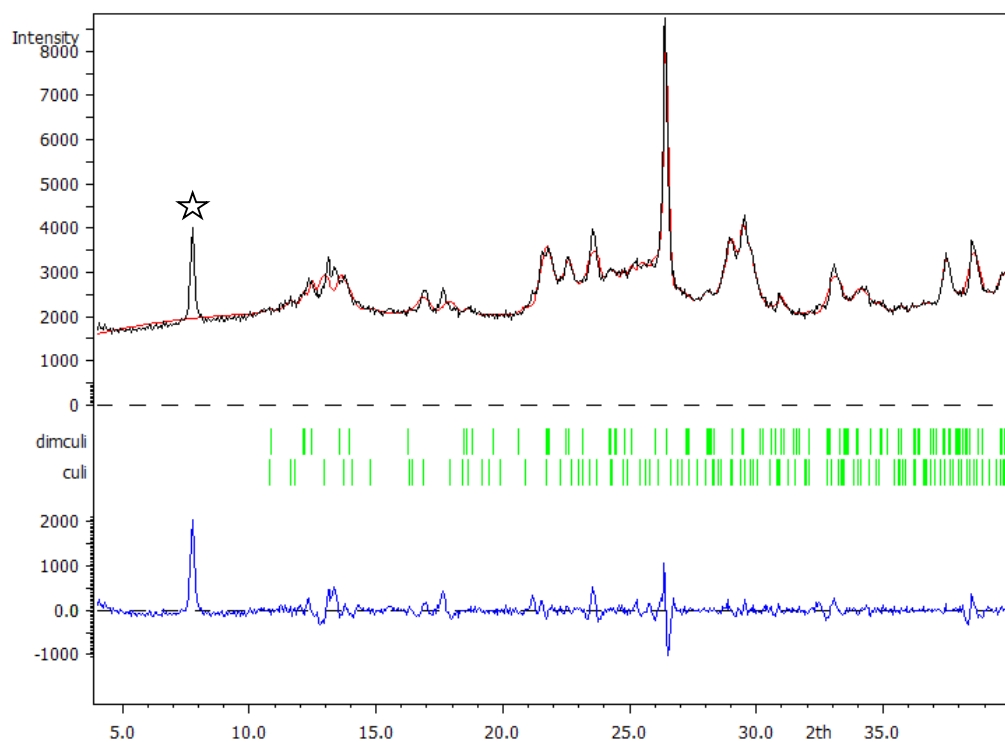

**Figure S1.10.** XRD pattern experimental (black) and fitted to the calculated diffractograms of compounds **2** and **4** (red). The only non-fitted peak (marked with a star) corresponds to an unidentified crystalline phase.

## 2. Tables

**Table S1.1.** Selected hydrogen bonds (Å, °).

| Compound | D–H···A                     | d (D–H) | d (H···A) | d (D···A) | ∠ (DHA) |
|----------|-----------------------------|---------|-----------|-----------|---------|
| <b>3</b> | O1W–H1W···Cl2 <sup>i</sup>  | 0.850   | 2.55      | 3.2138(3) | 136     |
|          | O1W–H2W···Cl2 <sup>ii</sup> | 0.850   | 2.55      | 3.3580(3) | 159     |
|          | N3–H3N···O1W <sup>iii</sup> | 0.860   | 1.85      | 2.6886(2) | 165)    |
|          | N4–H42···Cl2 <sup>iii</sup> | 0.860   | 2.31      | 3.1505(3) | 168     |
|          | C6–H62···Cl2 <sup>iv</sup>  | 0.930   | 2.81      | 3.6987(3) | 159     |
| <b>4</b> | N1–H1A···N2                 | 0.860   | 2.33      | 2.686(11) | 105     |
|          | N1–H1A···I2 <sup>v</sup>    | 0.860   | 2.93      | 3.627(9)  | 139     |
|          | N3–H3N···I1                 | 0.86    | 2.83      | 3.616(7)  | 154     |
|          | N4–H4A···N2                 | 0.860   | 2.31      | 2.656(11) | 104     |
|          | N4–H4B···I2 <sup>vi</sup>   | 0.860   | 2.84      | 3.639(8)  | 155     |

Symmetry transformations used to generate equivalent atoms: i =  $-x, y+1/2, -z+1/2$ ; ii =  $x, y+1, z$ ; iii =  $-x+1, y-1/2, -z+1/2$ ; iv =  $-x+1, y+1/2, -z+1/2$ ; v =  $-x+1/2, y+1/2, -z+3/2$ ; vi =  $x-1/2, -y+1/2, z+1/2$ .

**Table S1.2.** Selected IR bands for neutral and anionic thiosemicarbazone derivatives and proposed assignments.

|                                                                                                      | HL ligand                                                              | Compound 1                                                                                | Compound 2                                                                                | Compound 3                                                                                                     | Compound 4                                                                                                                         |
|------------------------------------------------------------------------------------------------------|------------------------------------------------------------------------|-------------------------------------------------------------------------------------------|-------------------------------------------------------------------------------------------|----------------------------------------------------------------------------------------------------------------|------------------------------------------------------------------------------------------------------------------------------------|
| $\nu(\text{OH})$                                                                                     |                                                                        | 3514(vw)                                                                                  |                                                                                           |                                                                                                                |                                                                                                                                    |
| $\nu(\text{NH}_2) + \nu(\text{NH})$                                                                  | 3433(s)                                                                | 3462(vw),3409(vw)                                                                         | 3422(s)                                                                                   | 3474(w),3341(w),                                                                                               | 3344(m),3244(s),                                                                                                                   |
| $\nu(=\text{CH})$                                                                                    | 3248(m),3151(m)                                                        | 3271(vw),3111(vw)                                                                         | 3273(vw),3130(vw)                                                                         | 3274(vw)                                                                                                       | 3140(s)                                                                                                                            |
| $\nu(\text{C-H})$                                                                                    | 3008(vw),2969(vw)                                                      |                                                                                           |                                                                                           | 3063-2976(vw)                                                                                                  | 3072-2982(vw)                                                                                                                      |
| $\nu(\text{C=N})_{\text{az,py}} + \delta(\text{NH}_2)$                                               | 1608(vs)                                                               | 1628(s),1602(s)                                                                           | 1626(s),1600(s)                                                                           | 1626(m)                                                                                                        | 1610(sh, f)                                                                                                                        |
| Tioamide I<br>[ $\delta(\text{N-H}) + \delta(\text{N-H})$ ]                                          | 1588(m), 1561(vw)                                                      | 1582(vw),1557(vw)                                                                         | 1583(vw),1557(vw)                                                                         | 1591(m)                                                                                                        | 1594(sh, f)                                                                                                                        |
| Thioamide I<br>[ $\delta(\text{N-H}) + \nu(\text{C=N})$ ]                                            | 1520(vs)                                                               |                                                                                           |                                                                                           |                                                                                                                | 1509(s)                                                                                                                            |
| $\text{Ar}(\text{C-C})_{\text{py}} + \delta(\text{C-H})_{\text{py}}$                                 | 1461(vs)                                                               | 1483(vs)                                                                                  | 1481(vs)                                                                                  | 1472(vw)                                                                                                       | 1484(vw)                                                                                                                           |
| Thioamide II<br>[ $\delta(\text{N-H}) + \nu(\text{C=N})$ ]                                           | 1430(vs)                                                               | 1448(m),1436(vs)                                                                          | 1447(m),1436(vs)                                                                          | 1451(vw),1435(vw)                                                                                              | 1451(m)                                                                                                                            |
| Thioamide III<br>[ $\delta(\text{N-H}) + \nu(\text{C=N}) + \delta(\text{N-C-S}) + \nu(\text{C=S})$ ] | 1362(vs),1290(vs),<br>1233(m),1145(w),<br>1108(vs),1063(m),<br>994(vw) | 1381(w),1317(w),<br>1291(w),1268(vw),<br>1227(s),1171(s),<br>1155(m),1105(w)<br>1018(vw), | 1376(w),1311(w),<br>1291(w),1264(vw),<br>1226(s),1167(s),<br>1154(m),1105(w)<br>1017(vw), | 1373(vw),1342(w),<br>1297(w),1280(m),<br>1229(m),1193(m),<br>1156(w),1102(w),<br>1049(vw),1034(vw),<br>1015(w) | 1370(m),1347(w),<br>1307(vw),1281(m),<br>1241(w),1217(w),<br>1197(w),1159(w),<br>1117(m),1086(w),<br>1053(w),1035(w),<br>1010(vw), |
| $\nu(\text{N-N})$                                                                                    | 932(vw)                                                                | 909(m)                                                                                    | 909(m)                                                                                    | 934(m)                                                                                                         | 915(m)                                                                                                                             |
| $\delta(=\text{CH})$                                                                                 | 876(s)                                                                 | 879(m)                                                                                    | 876(sh, m)                                                                                | 880(m)                                                                                                         | 876(m)                                                                                                                             |
| Thioamide IV<br>[ $\nu(\text{C=S})$ ]                                                                | 820(s)                                                                 |                                                                                           |                                                                                           |                                                                                                                | 821(m)                                                                                                                             |
| $\gamma(\text{C-C-C/N})_{\text{py}}$                                                                 | 775(s),740(m)                                                          | 781(s),731(sh,m)                                                                          | 780(s),731(sh,m)                                                                          | 772(m),742(m)                                                                                                  | 758(s),721(m)                                                                                                                      |
| (C-C)                                                                                                | 619(s)                                                                 | 626(s)                                                                                    | 623(s)                                                                                    | 617(m)                                                                                                         | 685(w)                                                                                                                             |
| $\delta(\text{C-H})_{\text{py}}$                                                                     | 559(vw),519(w)                                                         | 519(w)                                                                                    | 519(w)                                                                                    | 526-495(vw)                                                                                                    | 575(s),542(m)                                                                                                                      |
| $\gamma(\text{C-H})_{\text{pi}} + \gamma(\text{C-C-C/N})_{\text{py}}$                                | 419(m)                                                                 | 417(m)                                                                                    | 417(m)                                                                                    | 416(w)                                                                                                         | 432(w)                                                                                                                             |

vs = very strong, s = strong, m = medium, w = weak, vw = very weak, sh = shoulder, az = azomethinic, py = pyridine ring.

## 2. Computational studies

### 1. Thermodynamics

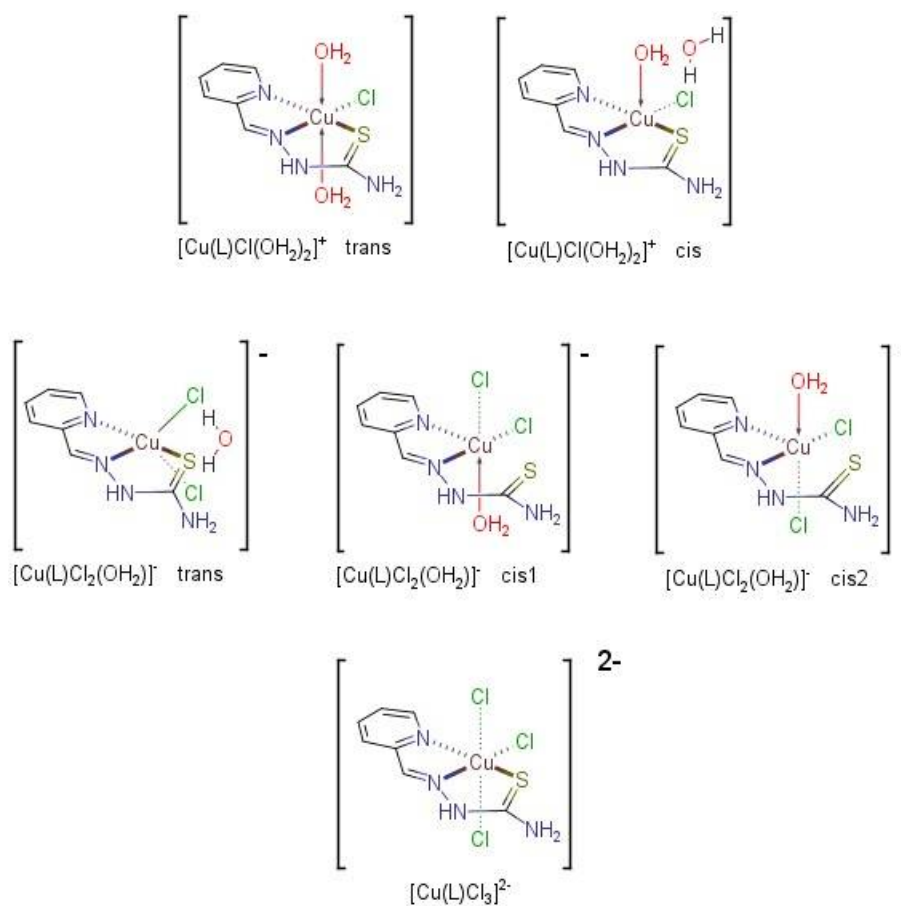

**Figure S2.1.** Substitution of aqua ligands by chlorido ones in complex with neutral HL ligand.

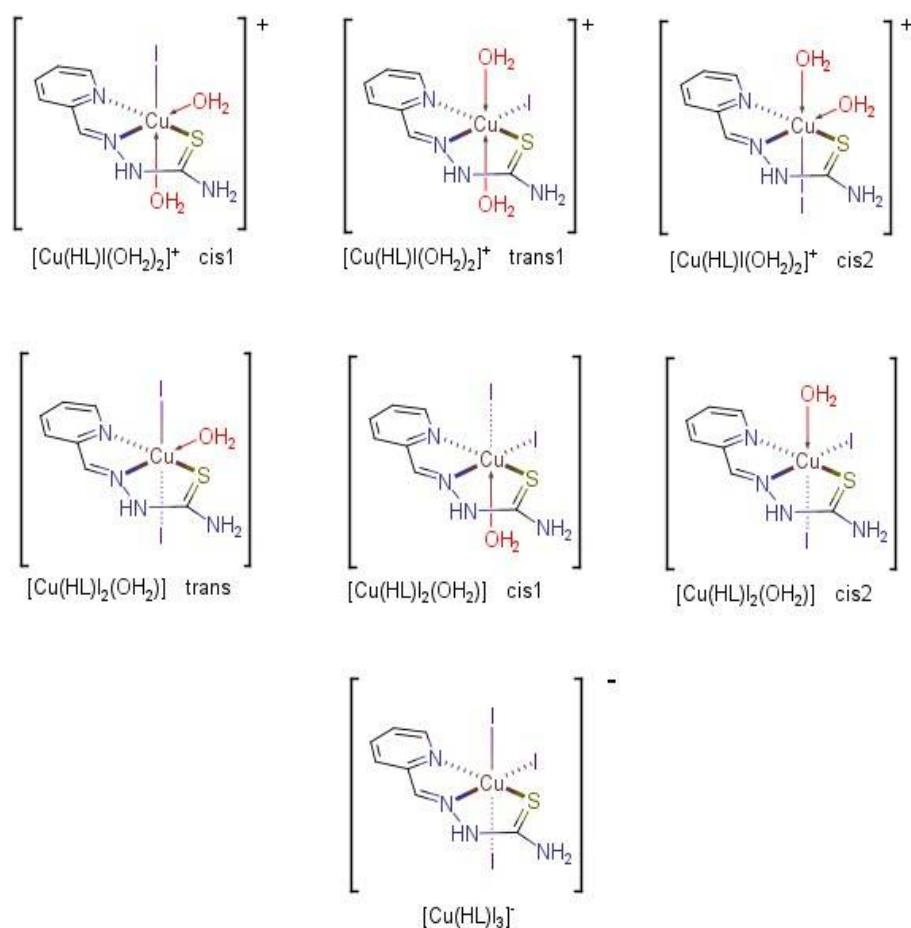

**Figure S2.2.** Substitution of aqua ligands by iodido ones in complex with neutral HL ligand.

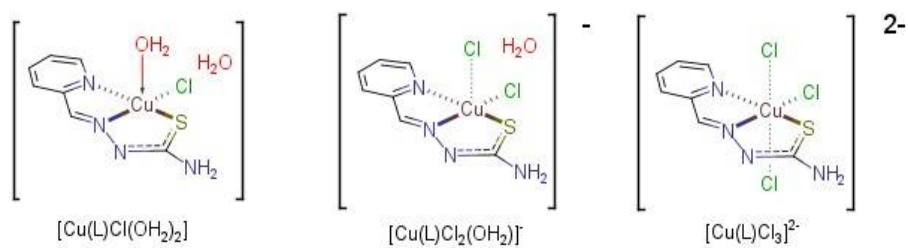

**Figure S2.3.** Substitution of aqua ligands by chlorido ones in complex with anionic  $L^-$  ligand.

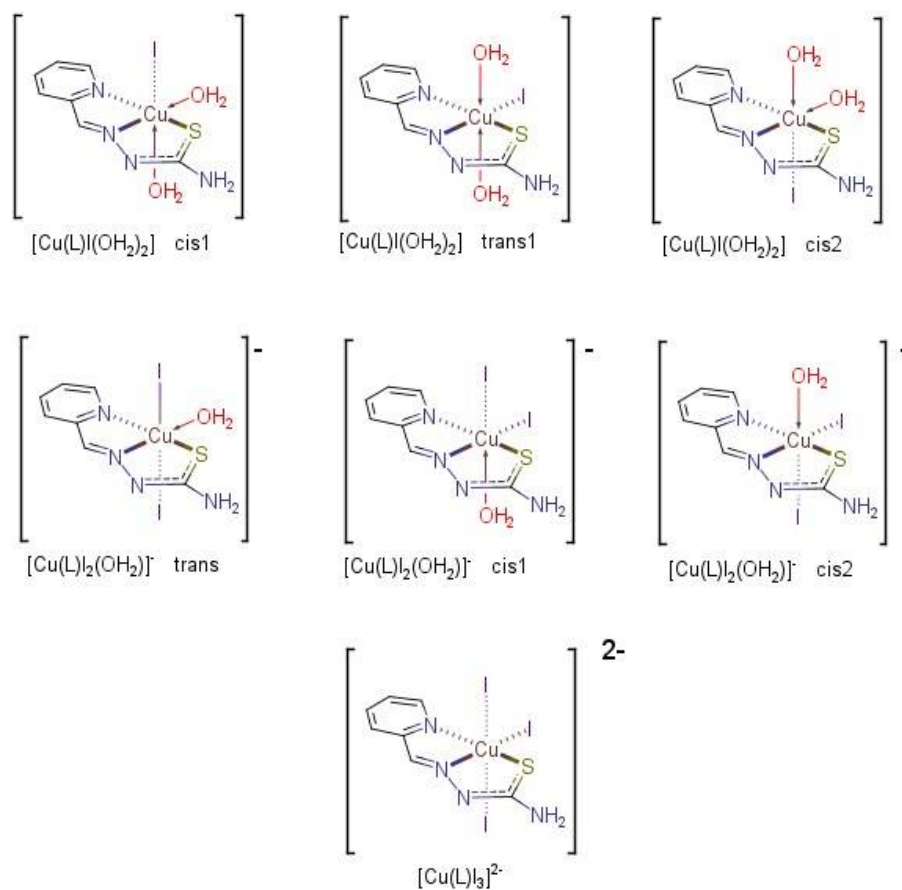

**Figure S2.4.** Substitution of aqua ligands by iodido ones in complex with anionic L<sup>-</sup> ligand.

## 2. Molecular magnetism

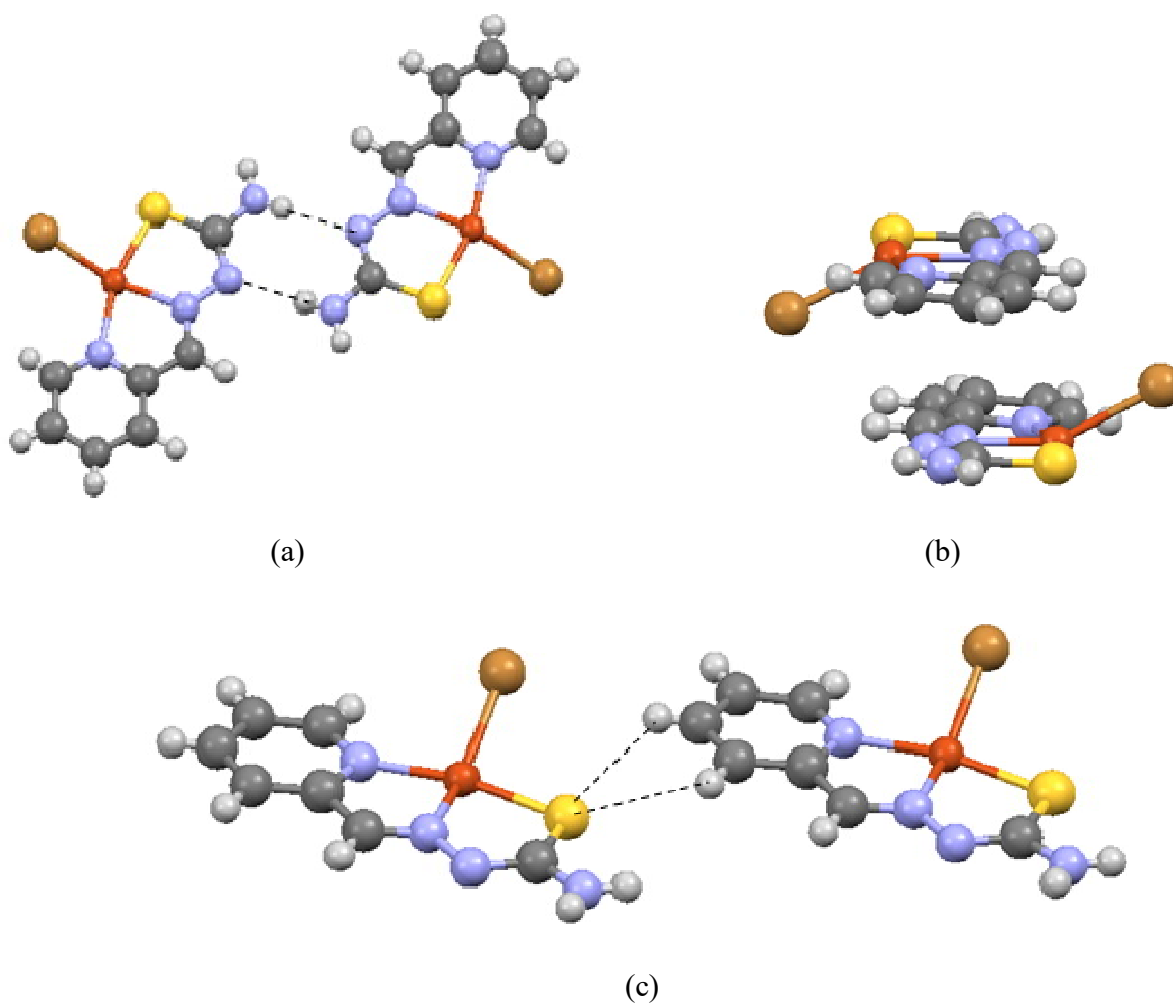

**Figure S2.5.** Different models to evaluate the intermolecular magnetic interactions in the  $[\{\text{CuLBr}\}_2]$  compound. (a) Model 1, interaction through the (N $\cdots$ H–N) hydrogen bonds ( $J_1$ ). (b) Model 2,  $\pi$ – $\pi$  stacking between two  $[\text{CuLBr}]$  units ( $J_2$ ). (c) Model 3, magnetic interactions through (S $\cdots$ H–C) linkages ( $J_3$ ).



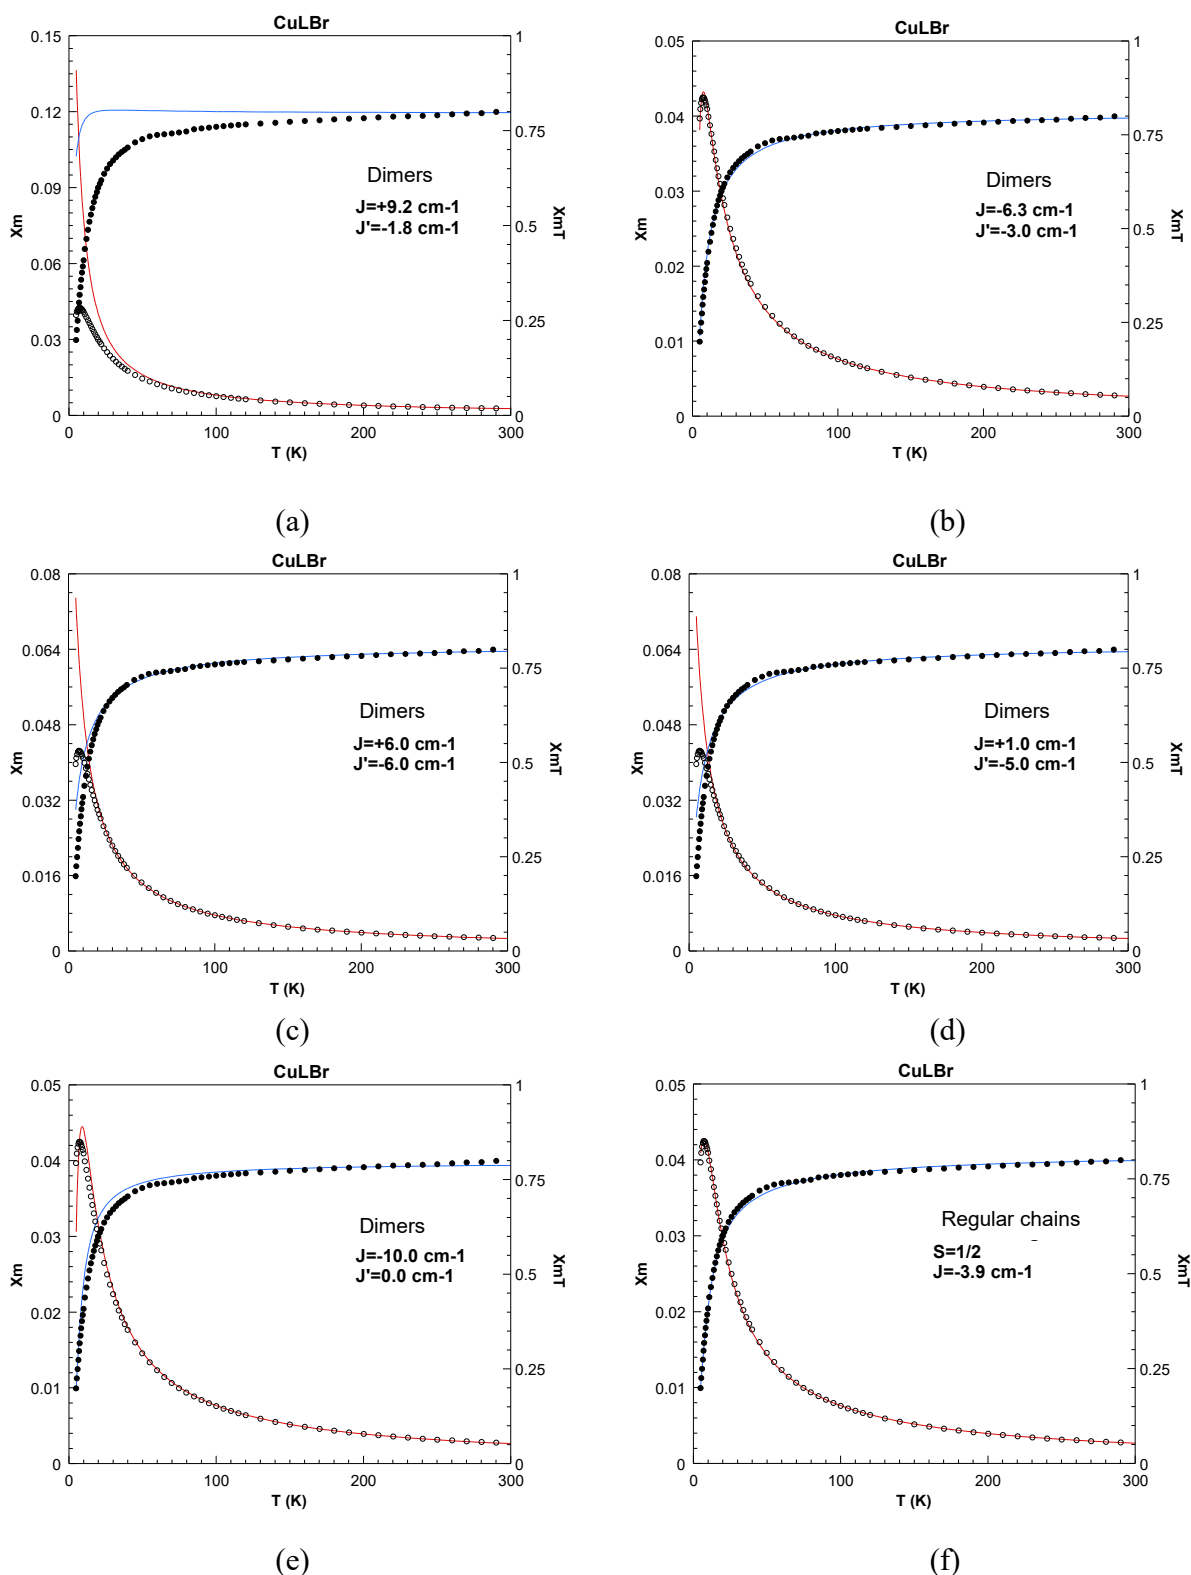

**Figure S2.6.** Experimental  $\chi_m$  vs  $T$  (●) and  $\chi_m T$  vs  $T$  (○) for the CuLBr ( $= [\{\text{CuLBr}\}_2]$ ) compound, together with the corresponding fits  $\chi_m$  vs  $T$  (red) and  $\chi_m T$  vs  $T$  (blue) considering the  $J$  values given on each chart (these values come from a  $H = -J S_1 S_2$  hamiltonian, so that they double those given in text for the  $J$  parameter). Note that (c) and (d) are meaningless approaches.
